# Supplementary material
Source: Springer Nature journal article supplement (https://www.springermedizin.de/resource/supplementary/13102_2009_37_MOESM5_ESM.pdf/9667656)

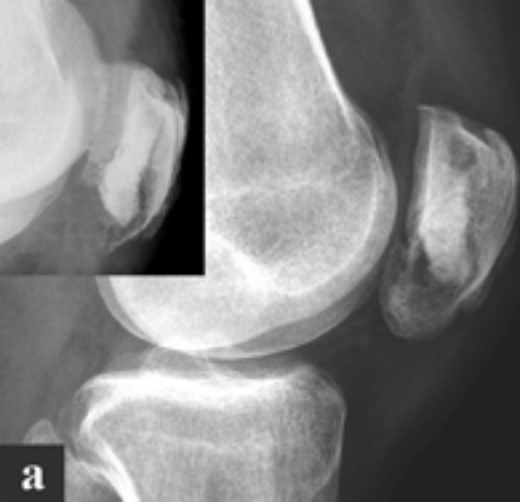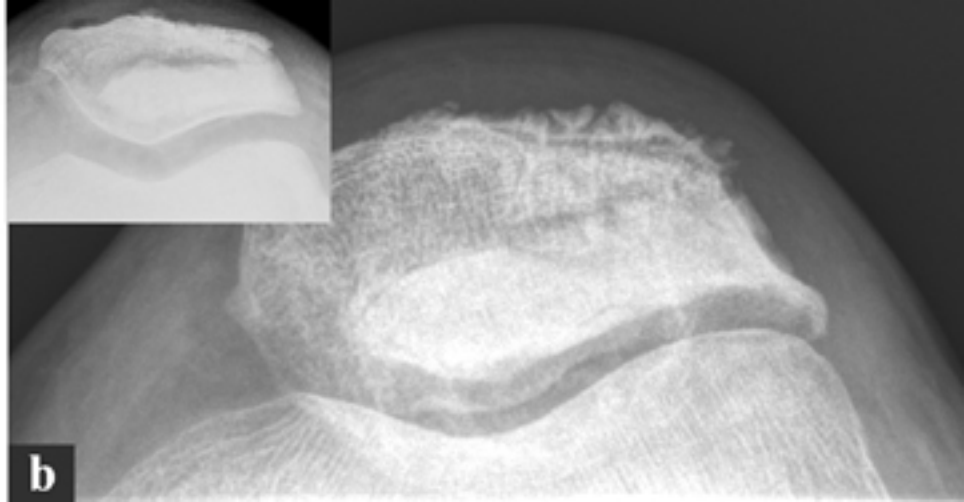

Supplement: MOESM5 [file 9667656]
